# Supplementary material for: In Silico, Experimental, Mechanistic Model for Extended-Release Felodipine Disposition Exhibiting Complex Absorption and a Highly Variable Food Interaction
Source: PLOS journal article supplement (doi:10.1371/journal.pone.0108392), 2014-09-30
Supplement: S1 (10.1371/journal.pone.0108392.s001) [file journal.pone.0108392.s001]

## SUPPORTING INFORMATION

### In Silico, Experimental, Mechanistic Model for Extended-Release Felodipine Disposition Exhibiting Complex Absorption and a Highly Variable Food Interaction

Sean H. J. Kim, Andre J. Jackson, C. Anthony Hunt

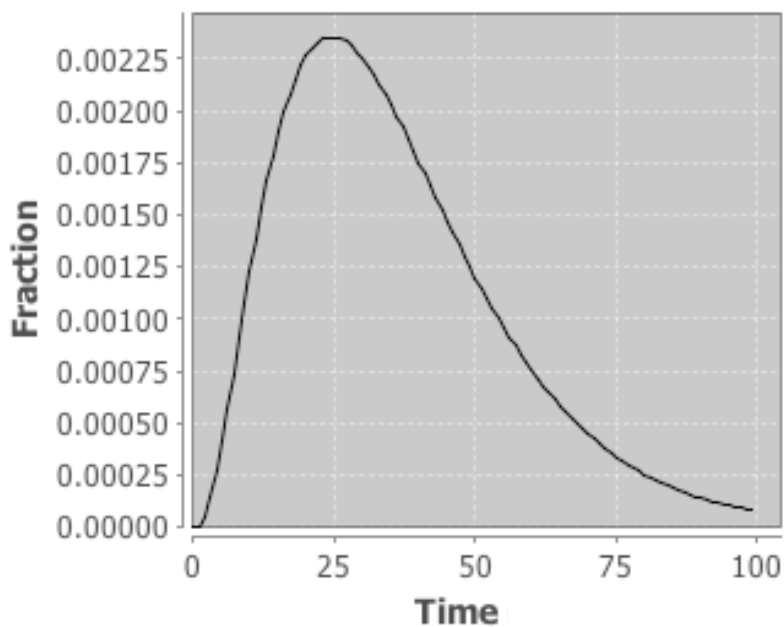

**Figure S1.** Plasma concentration-time profile of an analog parameterized to Table 1's default values.

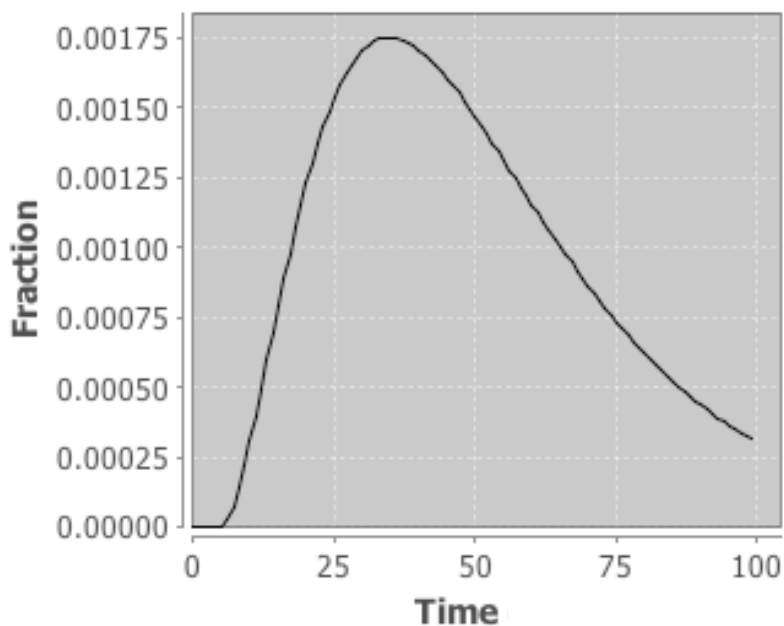

**Figure S2.** Plasma concentration-time profile of the analog from Fig. S1 with  $DtoGDelay = 5$  (default = 1) and  $DtoGProb = 0.4$  (default = 0.8).

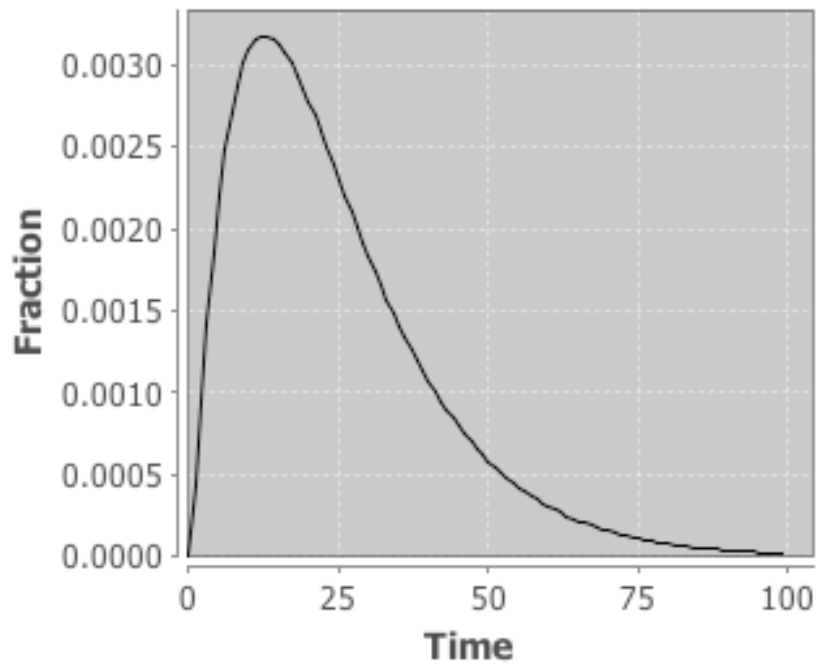

**Figure S3.** Plasma concentration-time profile of the analog from Fig. S1 with *DtoGFract* set to 0.8 (default = 0.1).

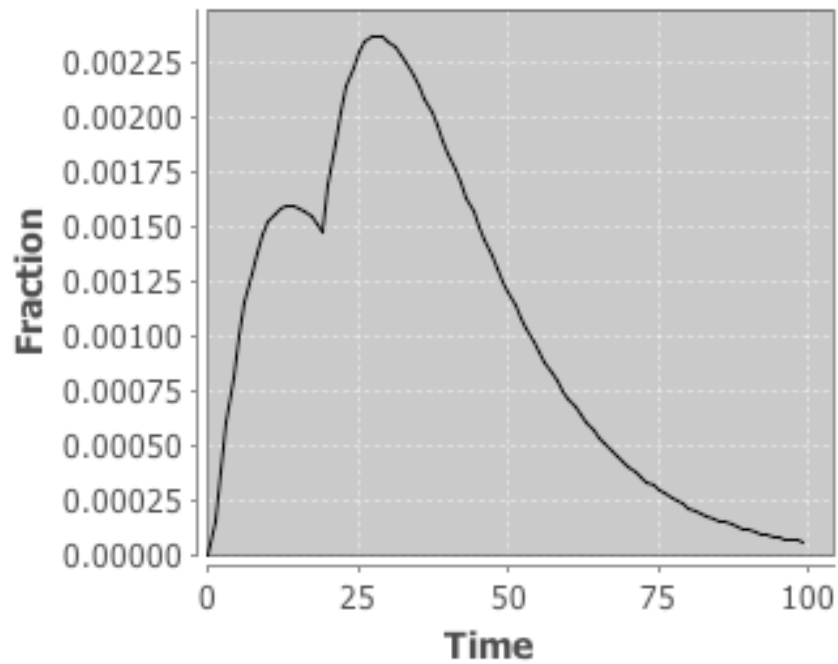

**Figure S4.** Plasma concentration-time profile of the analog from Fig. S1 with *DiffGRatio* = 0.5 (default = 1) and *GAtOPFract* = 0.6 (default = 0.1).

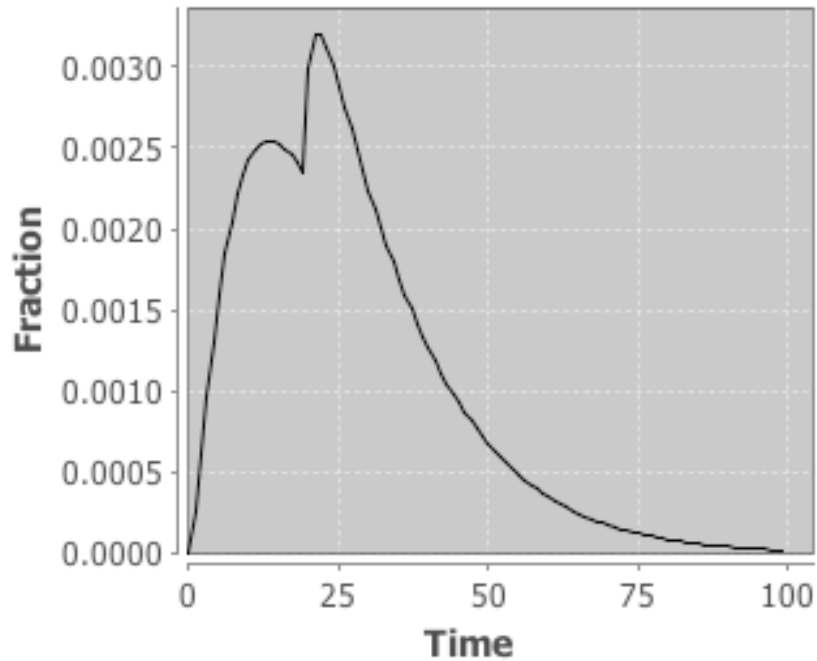

**Figure S5.** Plasma concentration-time profile of the analog from Fig. S1 with  $DiffGRatio = 0.8$  (default = 1),  $GAtoPFract = 0.6$  (default = 0.1), and  $GBtoPFract = 0.7$  (default = 0.1).

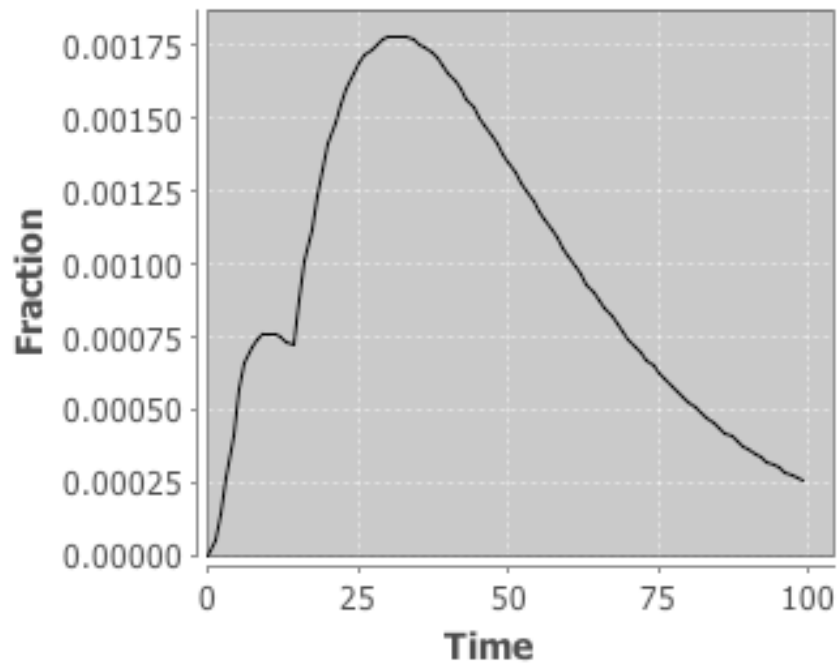

**Figure S6.** Plasma concentration-time profile of the analog from Fig. S1 with  $GtoCDelay = 5$ ,  $GtoCFract = 0.6$ ,  $GtoCProb = 0.7$ ,  $GCtoPDelay = 15$ ,  $GCtoPFract = 0.2$ , and  $GCtoPProb = 0.2$ , which specify drug movement to and from GI/tissue space C.

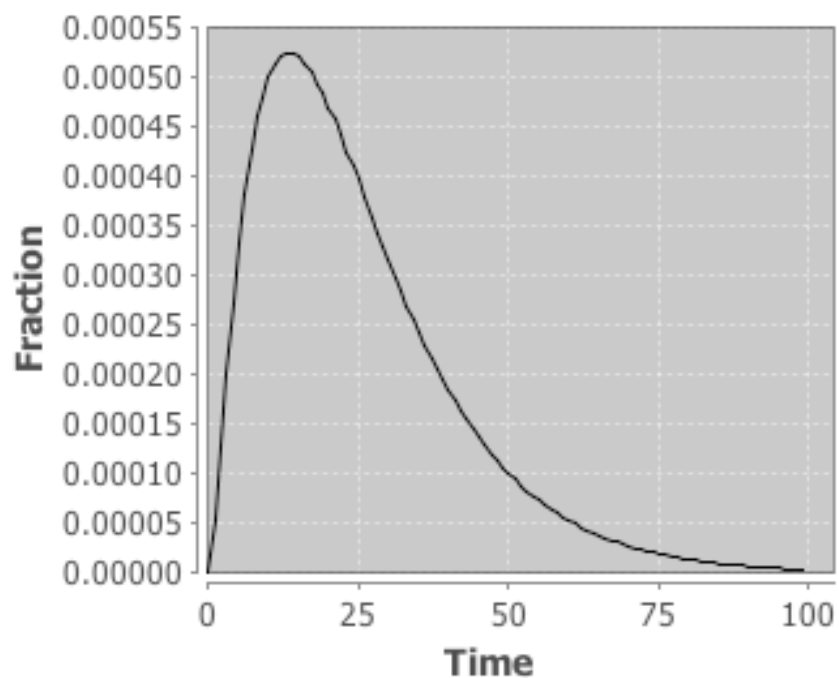

**Figure S7.** Plasma concentration-time profile of the analog from Fig. S1 with  $PtoEFract$  set to 0.6 (default = 0.1).

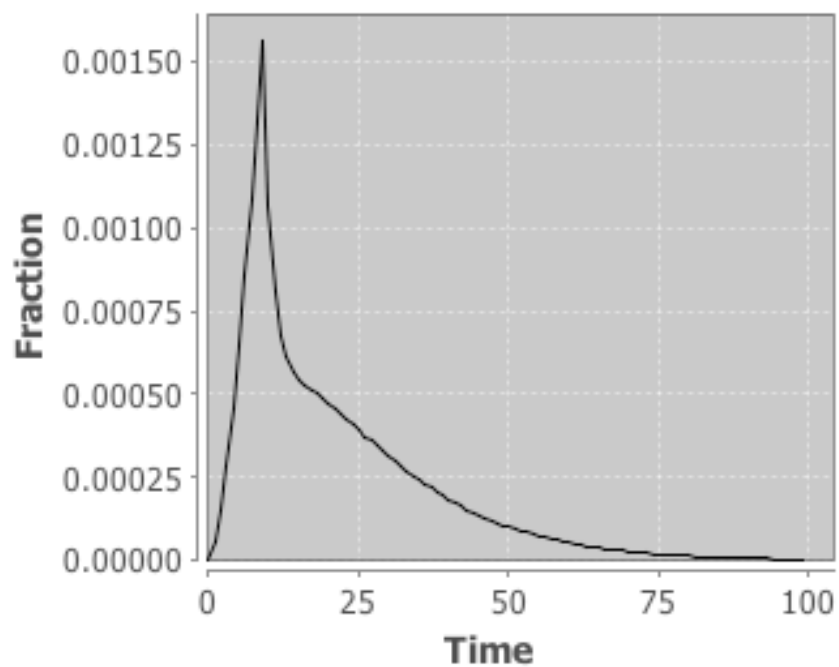

**Figure S8.** Plasma concentration-time profile of the analog from Fig. S1 with  $PtoEDelay = 10$  (default = 0) and  $PtoEFract = 0.6$  (default = 0.1).

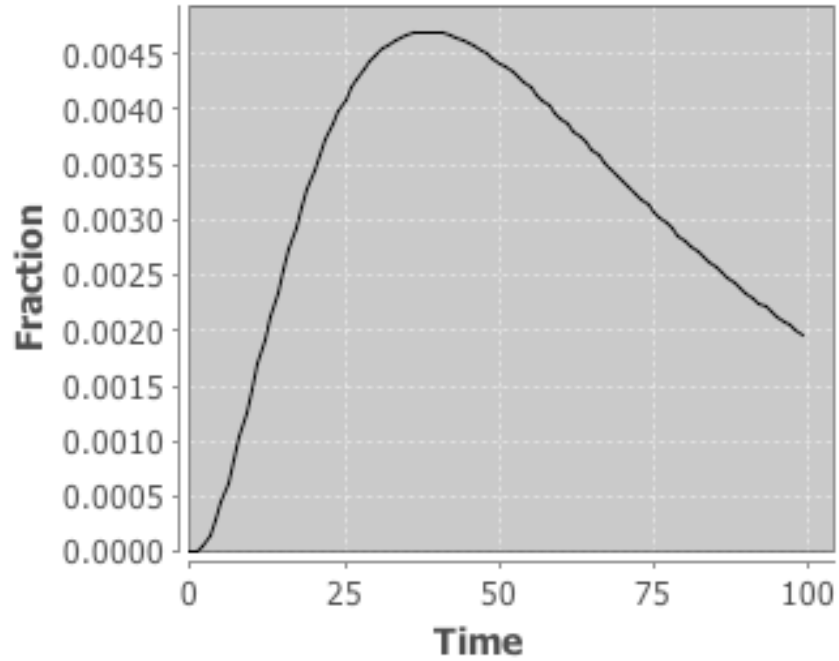

**Figure S9.** Plasma concentration-time profile of the analog from Fig. S1 with *PtoEProb* set to 0.2 (default = 0.8).

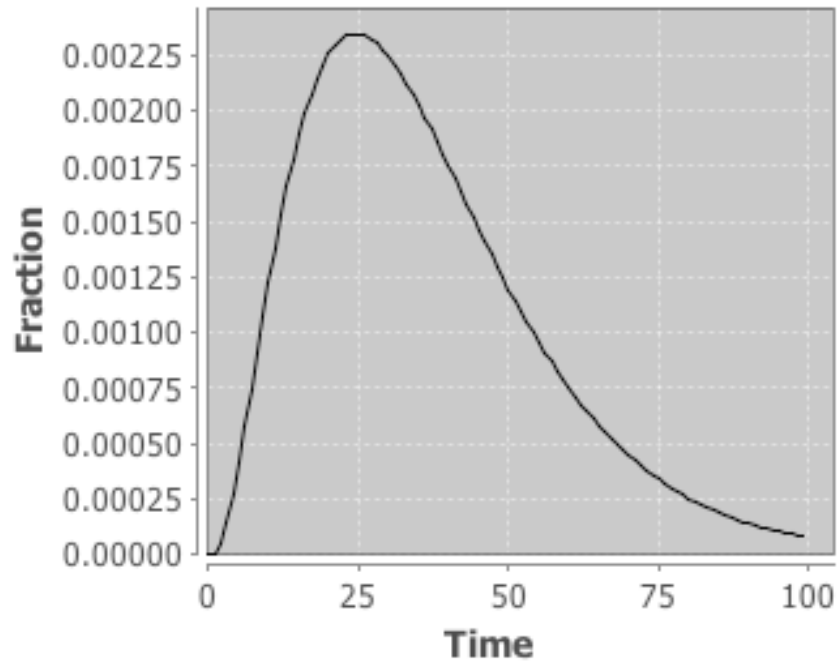

**Figure S10.** Plasma concentration-time profile of the analog from Fig. S1 with *InitDose* increased to 50000 (default = 10000). No change in plasma profile is expected, which is measured in dose fraction.
